# Supplementary material for: Spatiotemporal regulation of Heterochromatin Protein 1- alpha oligomerization and dynamics in live cells
Source: PubMed Central journal article supplement (PMC4523856; doi:10.1038/srep12001), 2015-08-04
Supplement: srep12001-s1.pdf [file srep12001-s1.pdf]

## Supporting Material

Spatiotemporal regulation of Heterochromatin Protein 1- alpha oligomerization and dynamics in live cells

Elizabeth Hinde<sup>a,b</sup>, Francesco Cardarelli<sup>a,c</sup>, Enrico Gratton<sup>a\*</sup>.

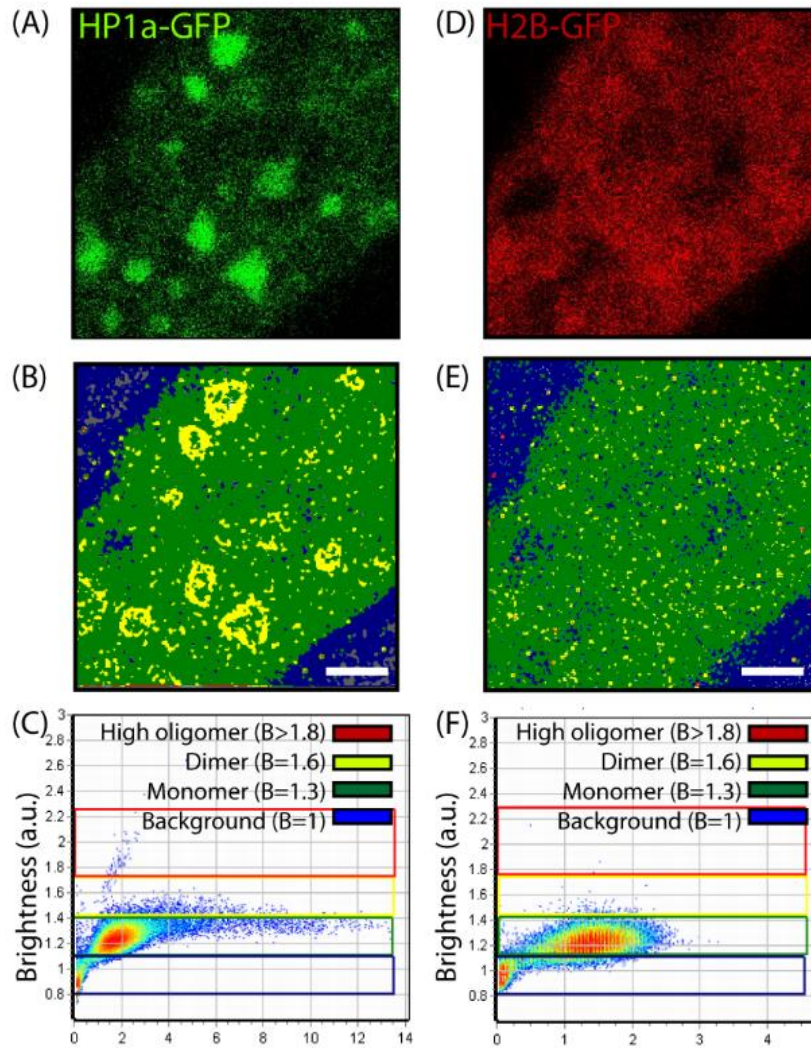

**Figure S1: Number and brightness analysis of HP1 alpha and H2B oligomerization in the absence of Hoechst 33342 staining.** (A) Intensity image of a NIH3T3 nucleus expressing HP1- $\alpha$ -EGFP. (B) Intensity image in (A) pseudo-colored according to the brightness distribution of HP1 $\alpha$  in (C). As can be seen the HP1 $\alpha$  dimers located around the periphery of the heterochromatin foci remain in the absence of Hoechst 33342 staining. (D) Intensity image of a NIH3T3 nucleus expressing H2B-mCherry. (E) Intensity image in (A) pseudo-colored according to the brightness distribution of H2B in (F). As can be seen H2B remains monomeric throughout the nucleoplasm in the absence of Hoechst 33342 staining.

## Derivation of the pair-correlation function for diffusing particles

The diffusion propagator is given by Equation 1:

$$C(r,t) = \frac{1}{(4\pi Dt)^{3/2}} \exp\left(-\frac{r^2}{4Dt}\right), \quad (1)$$

where  $C(r,t)$  can be interpreted as being proportional to the probability of finding a particle at position  $r$  and time  $t$  if the particle is at position 0 at time  $t = 0$ . The fluorescence intensity at any given time and position  $\delta r$  from the origin is given by:

$$F(t, \delta r) = \kappa Q \int W(r) C(r + \delta r, t) dr, \quad (2)$$

where it is assumed that the fluorescence is proportional to the concentration, quantum yield  $Q$ , excitation-emission laser power, filter combination, and the position of the particle in the profile of illumination described by  $W(r)$ . The pCF for two points at a distance  $\delta r$  as a function of the delay time  $\tau$  is calculated using the expression:

$$G(\tau, \delta r) = \frac{\langle F(t,0) \cdot F(t + \tau, \delta r) \rangle}{\langle F(t,0) \rangle \langle F(t, \delta r) \rangle} - 1, \quad (3)$$
